# Supplementary material
Source: Research Square preprint supplement (doi:10.21203/rs.3.rs-10307381/v1)
Supplement: Supplementary file 1 [file 7512555aee343d810356634a.docx]

**Snellen Optotype Construction and Calibration**

A fixed viewing distance of 10 cm was selected for optotype presentation within the developed portable visual acuity screening device to ensure standardization, portability, and reproducibility of testing conditions across diverse school and community settings. Conventional distance visual acuity assessment using Snellen charts requires a standardized testing distance of 6 m, which is often impractical in school environments due to space constraints, variable illumination, and logistical limitations. By adopting a short, fixed internal viewing distance, the device eliminates dependence on external spatial requirements while maintaining psychophysical equivalence to distance-based acuity testing.

The choice of a 10 cm viewing distance was guided by several methodological and practical considerations -

- A short-fixed distance allows precise control over retinal image size, minimizing variability related to examiner positioning or child movement.
- Children aged 6–16 years are developmentally capable of maintaining attention and head stability at this distance, particularly in a head-mounted or enclosed viewing configuration.
- The 10 cm distance facilitates compact device design, reduces optical and mechanical complexity, and ensures consistent luminance and contrast conditions across test sessions.

Snellen optotypes incorporated into the device were constructed based on the classical psychophysical principle that each letter subtends an angle of **5 minutes of arc** at the testing distance. Given the fixed viewing distance of **10 cm** inherent to the device design, optotype dimensions were mathematically derived using standard trigonometric relationships:

- Letter height (H) = 2 × D × tan (5′/2)
- Letter width (W) = 4/5 × H
- Stroke thickness (S) = H/5

These calculations ensured that optotypes presented on the TFT screens were **psychophysically equivalent** to conventional Snellen chart letters viewed at 6 meters, thereby preserving the fundamental principles of spatial resolution measurement.

This ensured that the optotypes preserved correct spatial proportions and visual angles despite the reduced viewing distance.

By deriving optotype dimensions mathematically rather than arbitrarily scaling existing charts, the device achieves optotype fidelity equivalent to conventional Snellen testing. This approach minimizes perceptual distortion, avoids over- or under-estimation of visual acuity, and ensures that measured differences reflect true visual performance rather than display artifacts or inappropriate scaling.

Overall, fixing the viewing distance at 10 cm and designing optotypes using established angular resolution formulas provides a scientifically robust foundation for valid visual acuity screening. This strategy enhances standardization, facilitates comparison with conventional Snellen-based assessments, and supports reliable, repeatable testing in school-based pediatric populations.

**Snellen Optotype Scaling**

Using the above mathematical framework, optotype dimensions were generated for standard Snellen acuity levels ranging from **6/6 to 6/60**, with precise control over letter height, width, and stroke thickness. This rigorous calibration ensured accurate representation of spatial resolution thresholds and formed the methodological foundation for valid comparison between device-based and chart-based visual acuity measurements. By maintaining strict optotype equivalence, the device minimized perceptual bias and enhanced internal validity during subsequent analyses of accuracy and agreement.

In addition to theoretical derivation, the final optotype dimensions were refined through a **systematic trial-and-error process** conducted by evaluating optotype clarity and proportional accuracy among a **suitable representative population**, without constituting a formal pilot study. Initial letter dimensions calculated for the fixed 10 cm viewing distance using standard angular resolution formulas were iteratively adjusted to account for practical considerations such as display resolution, pixel rendering, contrast perception, luminance uniformity, and ease of recognition across the target age range. Observational assessment of child comprehension, viewing comfort, and recognition consistency was used to verify that the optotypes were neither oversized nor undersized for accurate screening. This iterative refinement ensured that the final optotype specifications were both mathematically valid and practically appropriate for real-world screening conditions, thereby enhancing measurement reliability while maintaining methodological transparency.

**Table 1: Calculated Snellen Optotype Letter Dimensions for Different Visual Acuity Levels (6/6 to 6/60) at a Fixed Eye-to-Display Distance of 10 cm Using the Standard Snellen Formula**

| Snellen Acuity | Letter Height (mm) | Letter Width(mm) | Thickness of the letter(mm) |
| --- | --- | --- | --- |
| 6/6 | 1.45 | 1.16 | 0.29 |
| 6/9 | 2.18 | 1.74 | 0.44 |
| 6/12 | 2.90 | 2.32 | 0.58 |
| 6/18 | 4.35 | 3.48 | 0.87 |
| 6/24 | 5.80 | 4.64 | 1.16 |
| 6/36 | 8.70 | 6.96 | 1.74 |
| 6/60 | 14.50 | 11.60 | 2.70 |
